# Supplementary material for: Effects of Nature-Based Group Art Therapy Programs on Stress, Self-Esteem and Changes in Electroencephalogram (EEG) in Non-Disabled Siblings of Children with Disabilities
Source: MDPI journal article supplement (doi:10.3390/ijerph18115912), 2021-05-31
Supplement: s1 [file s1]

## Supplementary Material

**Table S1.** Group art therapy programs.

| Session | Program                                | Expected Effect                                              | Activities                                                                                    |
|---------|----------------------------------------|--------------------------------------------------------------|-----------------------------------------------------------------------------------------------|
| 1       | Introducing myself                     | Pre-evaluation and inner search                              | Introduce yourself while appreciating nature                                                  |
| 2       | Feeling and expressing the five senses | To relieve stress and tension                                | Feeling nature's sounds, smells, touch, and light, and freely expressing these feelings       |
| 3       | Leaf frottage                          | To relieve stress and strengthen attention span              | Observing and expressing various leaves in nature; making a wish tree                         |
| 4       | Natural mandala                        | To strengthen psychological stability and concentration      | Forming a collective mandala using various natural objects                                    |
| 5       | Making colored sand                    | For psychological relaxation and to strengthen concentration | Drawing a picture using various sands surrounding them                                        |
| 6       | Story about trees                      | Stress relief and attention-getter                           | Talk about different types of trees and decorate tree rings                                   |
| 7       | Making a fruit                         | Stress relief and improved sociality                         | Observe trees and make your own fruits                                                        |
| 8       | Drawing using sand                     | Stress relief and psychological relaxation                   | Draw things using different types of sand                                                     |
| 9       | Making a map -Forest explorer          | To relieve stress and strengthen attention span              | Making a map of the forest in pairs                                                           |
| 10      | Expression using stones                | Stress relief and stability                                  | Make and design your own comfortable space using various types of stones                      |
| 11      | Story about charcoal                   | Stress relief and increased sense of accomplishment          | Expressing nature while understanding and using charcoal                                      |
| 12      | Photo therapy                          | To strengthen attention span and concentration               | Taking pictures of nature and drawing favorite parts                                          |
| 13      | Making a hideout 1                     | To relieve stress and improve social skills                  | Making a house using cloth and wood with the group members                                    |
| 14      | Making a hideout 2                     |                                                              |                                                                                               |
| 15      | Molding natural objects and photos     | To relieve stress and improve sense of achievement           | Creating your own sculpture using your own photos, branches, leaves, grass, and flowers       |
| 16      | I think the forest is...               | Stress relief and positive self-image                        | Illustrate your meaning of the forest on a postcard and decorate it with other group members. |
